# Supplementary material
Source: Springer Nature journal article supplement (https://www.springermedizin.de/resource/supplementary/12936_2012_2453_MOESM1_ESM.pdf/9543094)
Supplement: MOESM1 [file 9543094]

561 patients screened

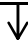

74 patients included

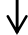

received Artemether-Lumefantrine 6-dose  
regimen twice a day for 3 days + 0.25  
mg/kg/d Primaquine for 14 days

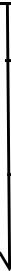

9 lost to follow  
up

4 violating  
protocol

59 followed up until day 28  
2 parasitological failures at day 28

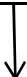

8 DNA available
